# Supplementary material for: Dendritic hybrid materials comprising polyhedral oligomeric silsesquioxane (POSS) and hyperbranched polyglycerol for effective antifungal drug delivery and therapy in systemic candidiasis
Source: Royal Society of Chemistry journal article supplement (doi:10.1039/d3nr04321e), 2023-01-01
Supplement: d3nr04321e1.pdf [file d3nr04321e1.pdf]

### Supplementary information

Dendritic hybrid materials comprising polyhedral oligomeric silsesquioxane (POSS) and hyperbranched polyglycerol for effective antifungal drug delivery and therapy in systemic candidiasis

Authors: Mahboobeh Jafari, Samira Sadat Abolmaali, Sedigheh Borandeh, Haniyeh Najafi, Zahra Zareshahrabadi, Omid Koochi-Hosseinabadi, Negar Azarpira, Kamiar Zomorodian, Ali Mohammad Tamaddon

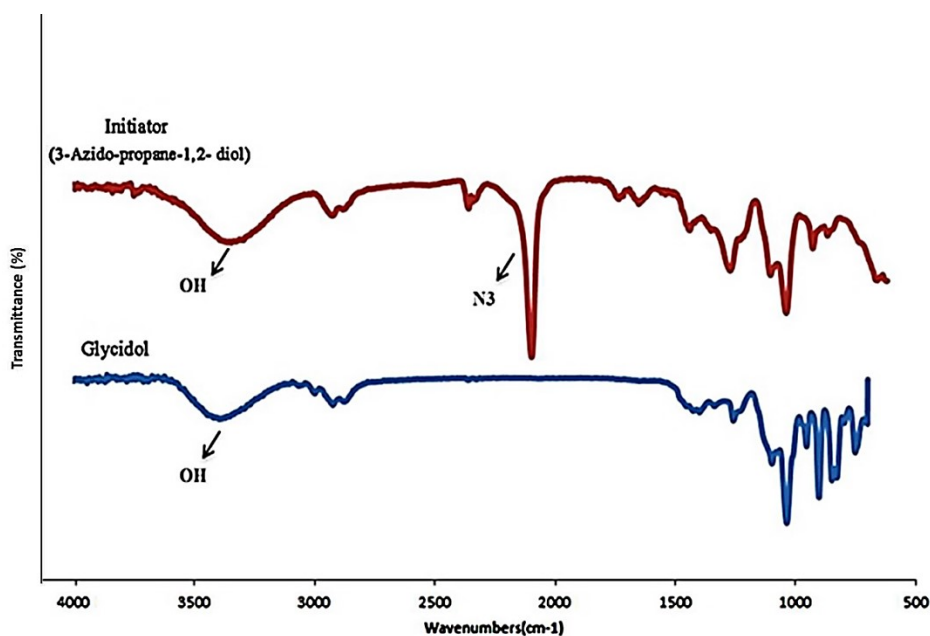

S1. FTIR spectra of initiator (3-azido-propane-1, 2-diol) and glycidol



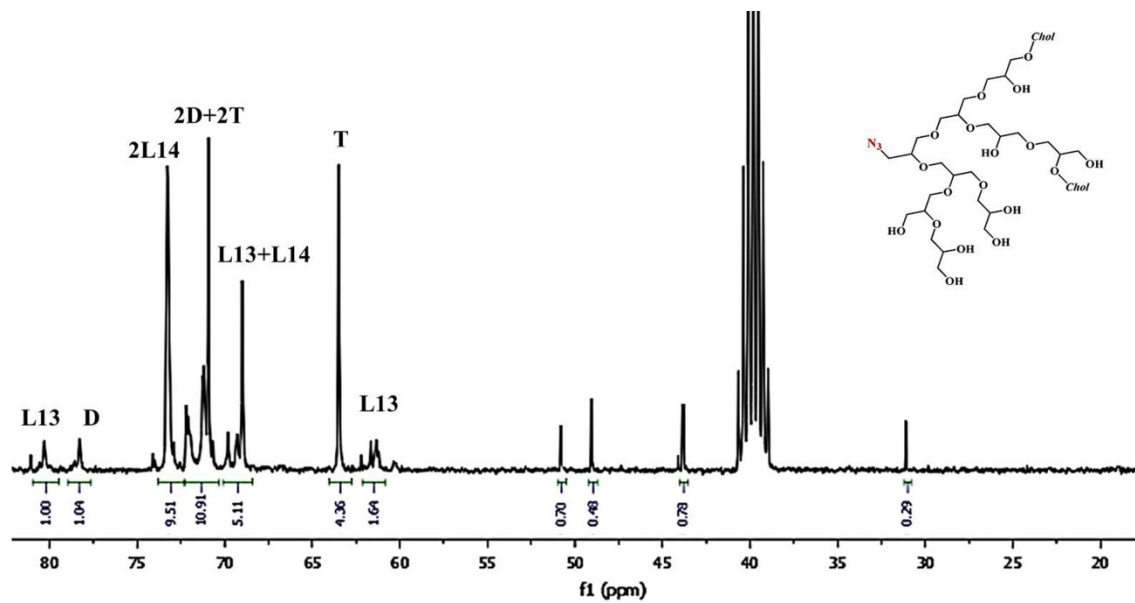

S4.  $^{13}\text{C}$  NMR spectrum of N3-HPG@Chol in DMSO-d<sub>6</sub>

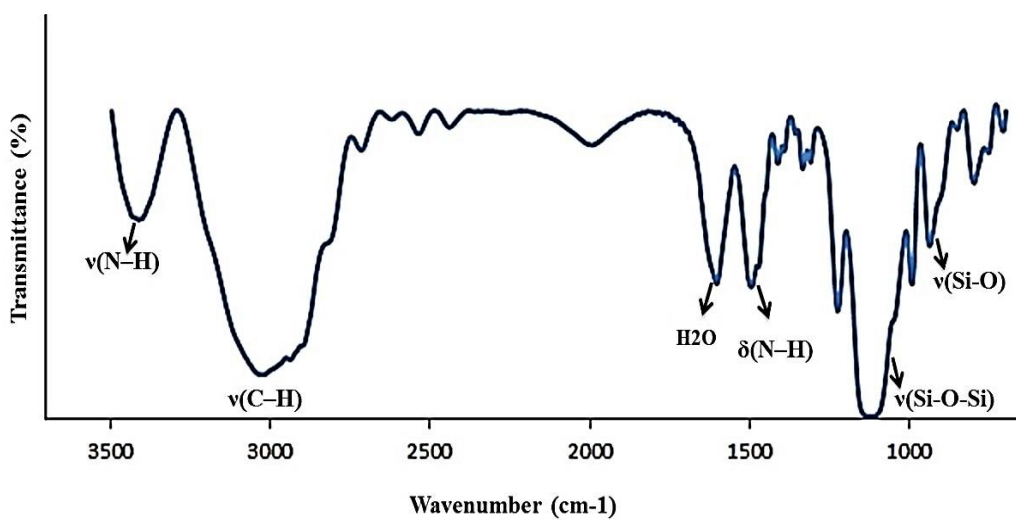

S5. FTIR spectrum of OA-POSS

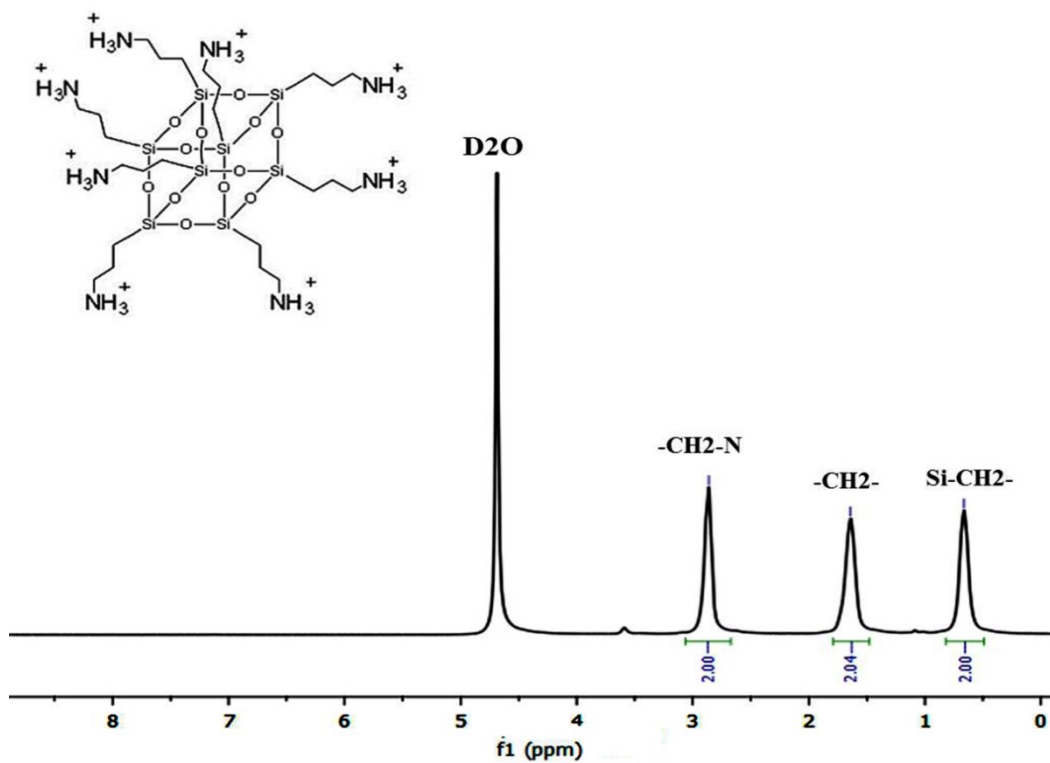

S6.  $^1\text{H}$  NMR spectra of OA-POSS in  $\text{D}_2\text{O}$

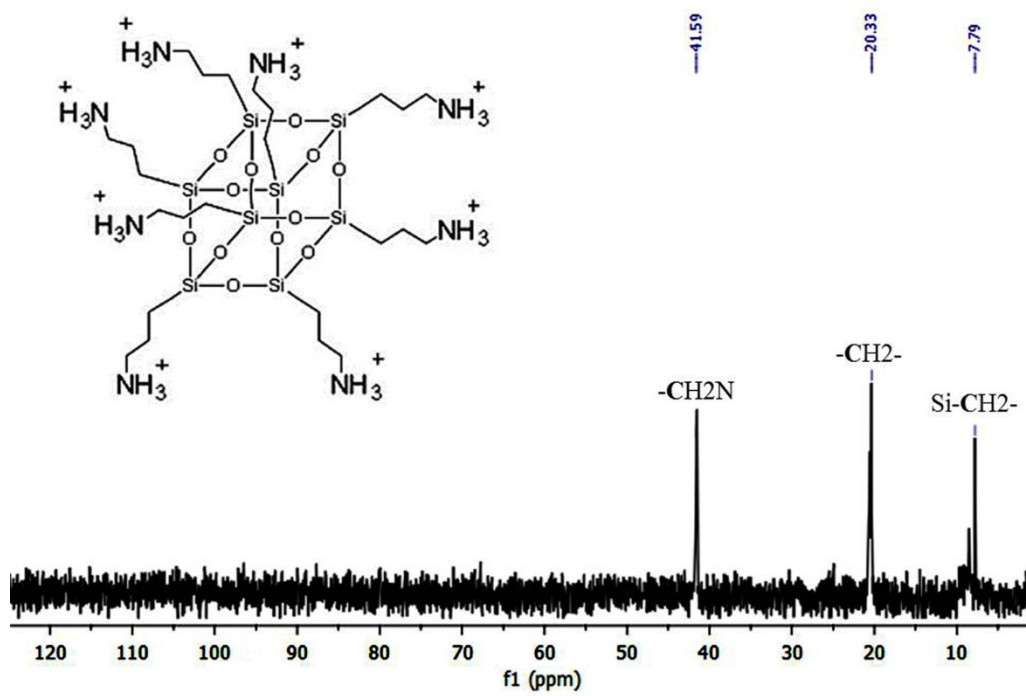

S7.  $^{13}\text{C}$  NMR spectrum of OA-POSS in  $\text{D}_2\text{O}$

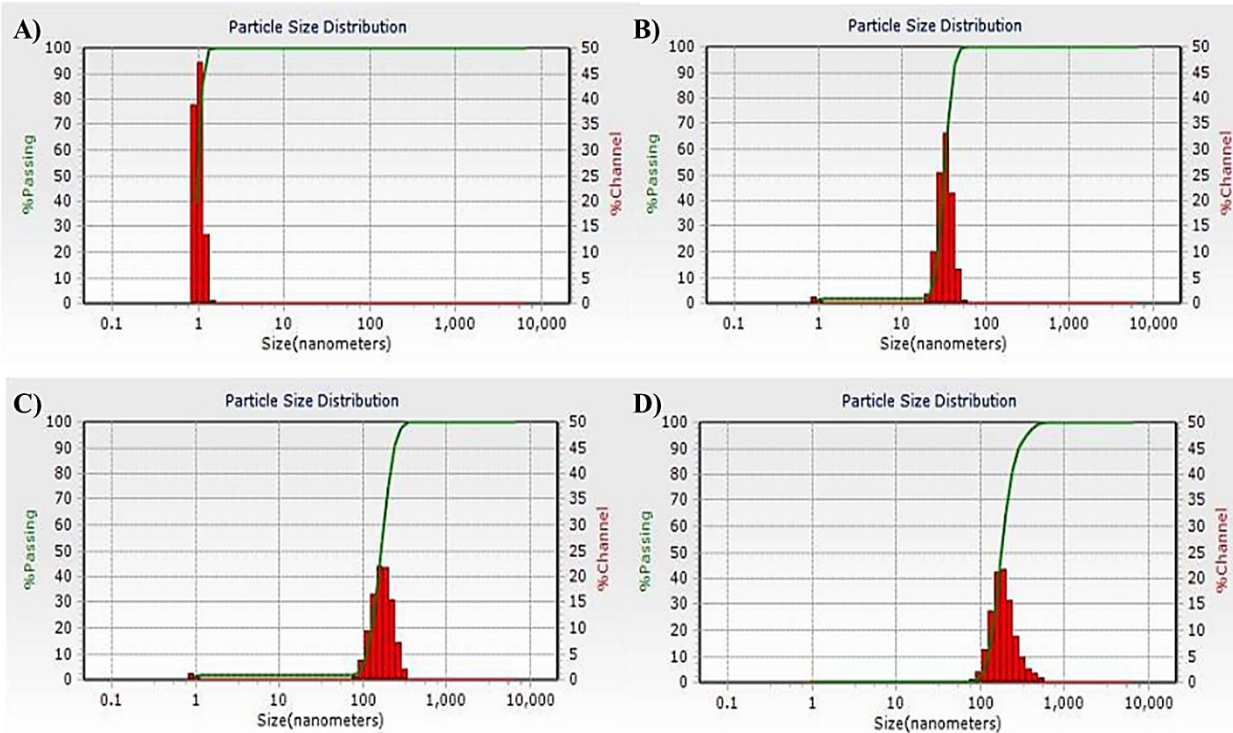

**S8.** Particle size distribution (intensity histograms) of A) OA-POSS, B) POSS-alkyne, C) POSS-HPG@Chol, D) POSS-HPG@Chol/AMB in 10 mM phosphate buffer (pH 7.4)

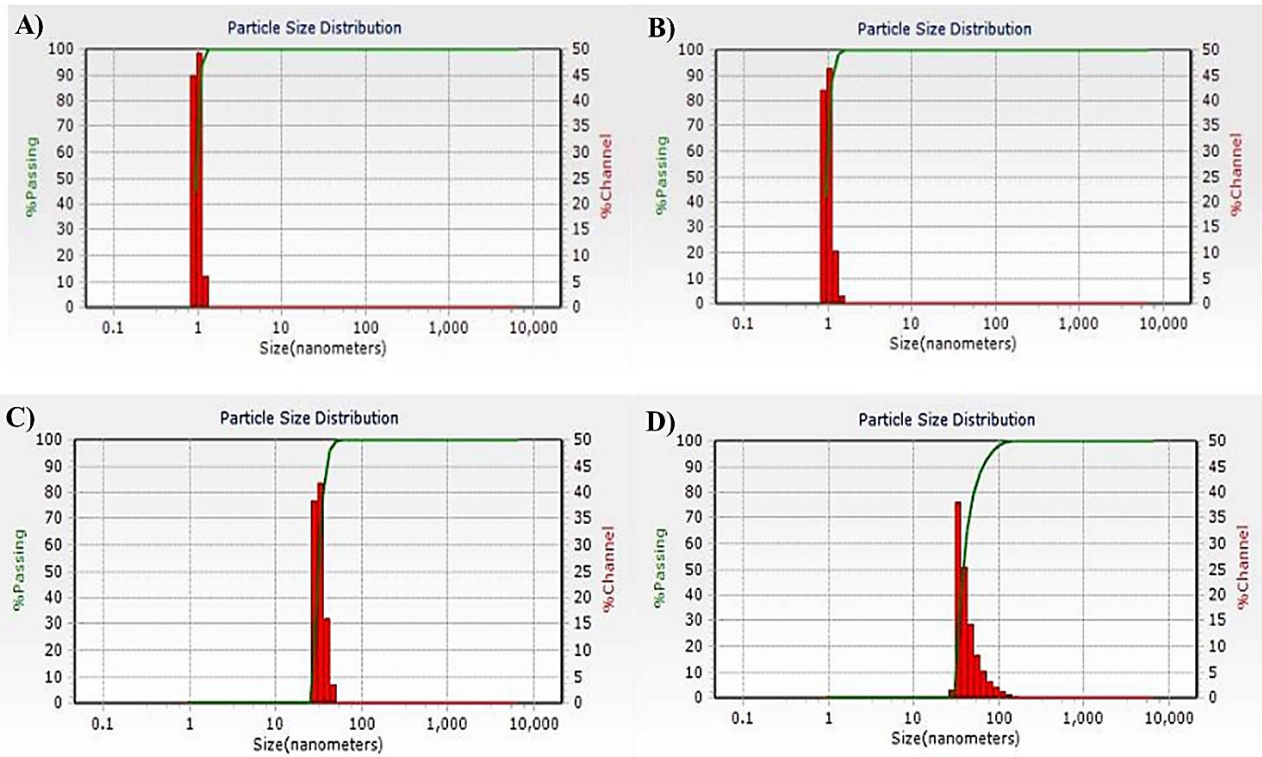

**S9.** Particle size distribution (intensity histograms) of A) OA-POSS, B) POSS-alkyne, C) POSS-HPG@Chol, D) POSS-HPG@Chol/AMB in 10 mM phosphate buffer (pH 7.4) / ethanol (1:1)
